# Supplementary material for: Microcalorimetric insight into the analysis of the reactive adsorption of ammonia on Cu-MOF and its composite with graphite oxide
Source: Royal Society of Chemistry journal article supplement (doi:10.1039/c2jm34973f), 2012-01-01
Supplement: c2jm34973f.pdf [file c2jm34973f.pdf]

## Supplementary Information

# Microcalorimetric Insight into the Analysis of the Reactive Adsorption of Ammonia on Cu-MOF and its Composite with Graphite Oxide

*Camille Petit,<sup>a†</sup> Sabine Wrabetz,<sup>b</sup> and Teresa J. Bandosz<sup>a\*</sup>*

<sup>a</sup> Department of Chemistry, The City College of New York, 160 Convent Avenue, New York, NY 10012 (USA)

<sup>b</sup> Fritz-Haber-Institut der Max-Planck-Gesellschaft, Faradayweg 4-6, 14195 Berlin (Germany)

## Figures

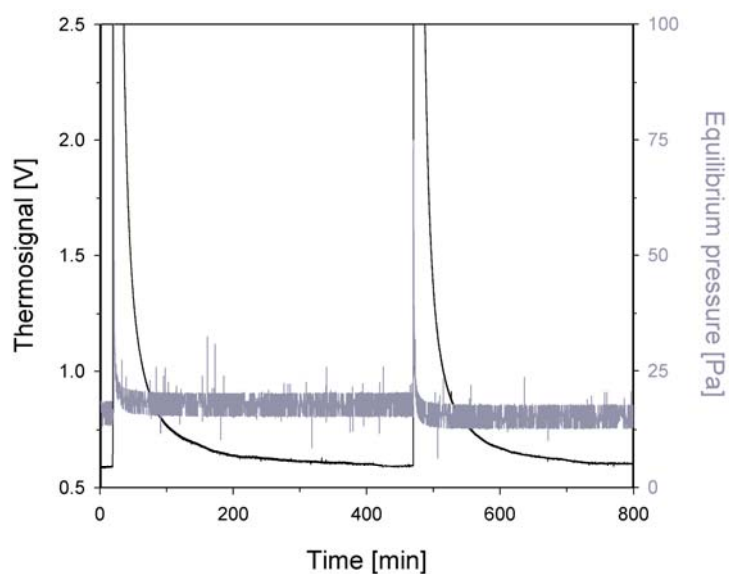

**Figure S1.** Selected raw data of the equilibrium pressure of  $\text{NH}_3$  for an individual adsorption step (grey), with the corresponding integral heat signal (black) for HKUST-1. The coverage is about  $1.0 \text{ mmol.g}^{-1}$ .

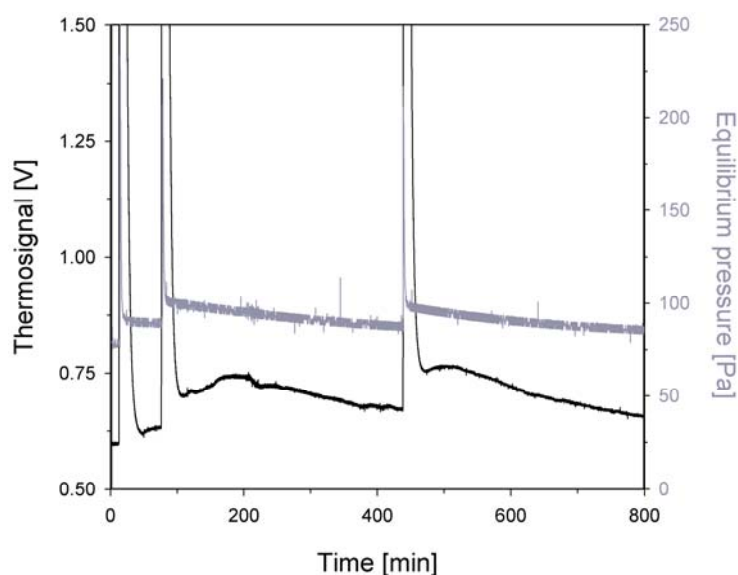

**Figure S2.** Selected raw data of the equilibrium pressure of  $\text{NH}_3$  for an individual adsorption step (grey), with the corresponding integral heat signal (black) for HKUST-1. The coverage range is above  $4.7 \text{ mmol.g}^{-1}$ . The bumps in the integral heat signal indicate secondary processes.

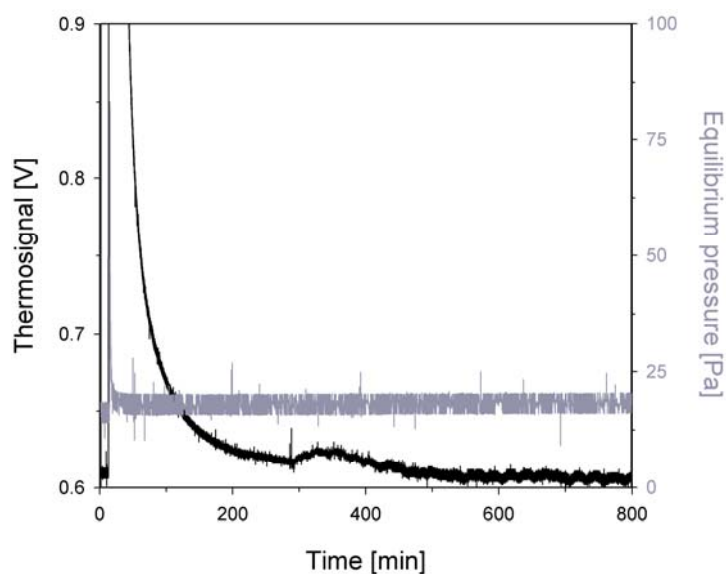

**Figure S3.** Selected raw data of the equilibrium pressure of  $\text{NH}_3$  for an individual adsorption step (grey), with the corresponding integral heat signal (black) for HKUST-1/GO. The coverage is about  $0.7 \text{ mmol.g}^{-1}$ . The bump in the integral heat signal indicates secondary processes.

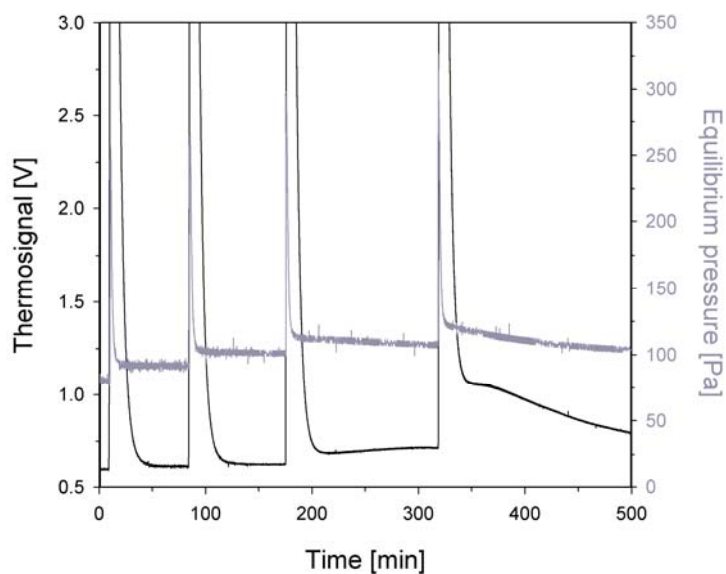

**Figure S4.** Selected raw data of the equilibrium pressure of  $\text{NH}_3$  for an individual adsorption step (grey), with the corresponding integral heat signal (black) for HKUST-1/GO. The coverage range is about  $4.0$  to  $5.0 \text{ mmol.g}^{-1}$ . The bumps in the integral heat signal indicate secondary processes.
